# Supplementary material for: On the Importance of Fresh Stock Solutions for Surfactant-Free Colloidal Syntheses of Gold Nanoparticles in Alkaline Alcohol and Water Mixtures
Source: MDPI journal article supplement (doi:10.3390/inorganics11040140), 2023-03-25
Supplement: s1 [file s1]

## **Supplementary Materials**

for

### **On the importance of fresh stock solutions for surfactant-free colloidal syntheses of gold nanoparticles in alkaline alcohol and water mixtures**

Jonathan Quinson

Biochemical and Chemical Engineering Department, Aarhus University

Åbogade 40, 8200 Aarhus, Denmark; [jquinson@bce.au.dk](mailto:jquinson@bce.au.dk)

## Abbreviations:

$d_N$ : Number weighted size (diameter) evaluated by TEM, Feret mean diameter defined as:

$$d_N = \frac{\sum d_i}{N}$$

$d_S$ : Surface weighted size (diameter) evaluated by TEM, Sauter mean diameter defined as:

$$d_S = \frac{\sum d_i^3}{\sum d_i^2}$$

$d_V$ : Volume weighted size (diameter) evaluated by TEM, De Brouckere mean diameter defined as:

$$d_V = \frac{\sum d_i^4}{\sum d_i^3}$$

$\sigma$ : standard deviation related to  $d_N$

PdI: polydispersity index defined as  $(\frac{\sigma}{d_N})^2$

EG: ethylene glycol

EtOH: ethanol

$\text{Li}_3\text{Ct}$ : trilithium citrate

MeOH: methanol

$\text{Na}_3\text{Ct}$ : trisodium citrate

NM: nanomaterial

NP: nanoparticle

PVP: polyvinylpyrrolidone

ROH: (mono)alcohol(s)

RT: room temperature, *ca.* 22 °C

spr: surface plasmon resonance

TEM: transmission electron microscope/microscopy

X: In Tables, this means that no stable colloids were obtained and no further characterization was performed.

-: In Tables, this means that the characterization could not be performed and/or the data is not available

**Table S1.** Effect of using a fresh an old stock solution of base for the synthesis of RT surfactant-free Au NPs, for different ROHs and different v.% of ROH. UV-vis and TEM characterization.

| ROH  | H <sub>2</sub> O<br>v.%<br>* | ROH<br>v.%<br>* | HAuCl <sub>4</sub><br>mM<br>* | Base<br>Old<br>Fresh | Base<br>mM<br>* | V<br>mL<br>* | T<br>°C | t<br>h | Base/Au<br>molar<br>ratio | $\lambda_{spr}$<br>( $\Delta\lambda/\lambda_{spr}$ )<br>nm | $A_{spr}/A_{450}$ | Relative yield<br>** | $A_{650}/A_{spr}$ | $A_{380}/A_{800}$ | d <sub>N</sub><br>nm   | d <sub>s</sub><br>nm | d <sub>v</sub><br>nm | PdI  | Data from |
|------|------------------------------|-----------------|-------------------------------|----------------------|-----------------|--------------|---------|--------|---------------------------|------------------------------------------------------------|-------------------|----------------------|-------------------|-------------------|------------------------|----------------------|----------------------|------|-----------|
| EtOH | 90                           | 10              | 0.5                           | NaOH-old             | 2               | 13           | RT      | 24     | 4                         | 612 (x.x%)                                                 | X                 | 0.26                 | 0.97              | 1.3               | X                      | X                    | X                    |      | This work |
|      |                              |                 |                               | NaOH-fresh           |                 |              |         |        |                           | 530 (7.0%)                                                 | 1.75              | 1.00                 | 0.20              | 8.20              | 9.1 ± 6.4              | 22.3                 | 31.0                 | 0.49 | [1]       |
|      | 70                           | 30              |                               | NaOH-old             |                 |              |         |        |                           | 544 (15.6%)                                                | 1.37              | 0.75                 | 0.78              | 1.4               | Network (> 20)         | X                    | X                    | X    | This work |
|      |                              |                 |                               | NaOH-fresh           |                 |              |         |        |                           | 518 (6.9%)                                                 | 1.52              | 0.81                 | 0.10              | 34.0              | 8.9 ± 2.2              | 10.0                 | 10.5                 | 0.06 | [1]       |
|      |                              |                 |                               | NaOH-fresh           |                 |              |         |        |                           | 517 (6.4%)                                                 | 1.63              | 0.64                 | 0.12              | 20.0              | 9.9 ± 2.3              | 11.0                 | 11.5                 | 0.05 | [1]       |
| MeOH | 90                           | 10              |                               | NaOH-old             |                 |              |         |        |                           | 584 (x.x%)                                                 | X                 | 0.15                 | X                 | X                 | X                      | X                    | X                    | X    | This work |
|      |                              |                 |                               | NaOH-fresh           |                 |              |         |        |                           | 570 (x.x%)                                                 | 0.62              | 0.65                 | 0.96              | 1.4               | Network (15)           | X                    | X                    | X    | [1]       |
|      | 70                           | 30              |                               | NaOH-old             |                 |              |         |        |                           | 576 (22.4%)                                                | 1.30              | 0.67                 | 0.91              | 1.3               | Network (10)           | X                    | X                    | X    | This work |
|      |                              |                 |                               | NaOH-fresh           |                 |              |         |        |                           | 557 (15.3%)                                                | 1.44              | 0.81                 | 0.77              | 1.2               | Network (10)           | X                    | X                    | X    | This work |
|      |                              |                 |                               | NaOH-fresh           |                 |              |         |        |                           | 531 (6.3%)                                                 | 1.84              | 1.00                 | 0.17              | 14.3              | 21.2 ± 7.1             | 26.3                 | 29.1                 | 0.11 | [1]       |
|      | 50                           | 50              |                               | NaOH-fresh           |                 |              |         |        |                           | 534 (7.0%)                                                 | 1.87              | 0.87                 | 0.22              | 10.9              | 23.4 ± 6.8<br>+ Chunks | X                    | X                    | X    | [1]       |
|      |                              |                 |                               | NaOH-old             |                 |              |         |        |                           | X                                                          | X                 | X                    | X                 | X                 | Network (15)           | X                    | X                    | X    | This work |
|      |                              |                 |                               | NaOH-fresh           |                 |              |         |        |                           | 542 (8.4%)                                                 | 1.72              | 0.74                 | 0.47              | 4.5               | 28.3 ± 11.1            | 39.3                 | 41.7                 | 0.15 | [1]       |
|      |                              |                 |                               |                      |                 |              |         |        |                           |                                                            |                   |                      |                   |                   |                        |                      |                      |      |           |

\* before volume contraction; \*\* evaluated as the ratio of A<sub>400</sub> for the sample and the maximum values of A<sub>400</sub> for the dataset for a given ROH. The number in parenthesis after ‘Network’ gives an indication of the size in nm.

**Table S2.** Effect of using a fresh or an old stock solution of base for the RT synthesis of Au NPs using additives such as citrate-based surfactants and PVP, for different ROH. UV-vis and TEM characterization.

**Table S2A.** Using EtOH as reducing agent.

| ROH  | H <sub>2</sub> O<br>v.%<br>* | ROH<br>v.%<br>* | HAuCl <sub>4</sub><br>mM<br>* | Base       | Base<br>mM<br>* | V<br>mL<br>* | T<br>°C | t<br>h | Base/Au<br>molar<br>ratio | Additive           | Add<br>mM<br>* | Additive/ Au<br>molar ratio | $\lambda_{\text{spr}}$<br>( $\Delta\lambda/\lambda_{\text{spr}}$ )<br>nm | $A_{\text{spr}}/A_{450}$ | Relative yield<br>** | $A_{650}/A_{\text{spr}}$ | $A_{380}/A_{800}$ | d <sub>N</sub><br>nm        | d <sub>s</sub><br>nm | d <sub>v</sub><br>nm | PdI | Data from |
|------|------------------------------|-----------------|-------------------------------|------------|-----------------|--------------|---------|--------|---------------------------|--------------------|----------------|-----------------------------|--------------------------------------------------------------------------|--------------------------|----------------------|--------------------------|-------------------|-----------------------------|----------------------|----------------------|-----|-----------|
| EtOH | 70                           | 30              | 0.5                           | NaOH-old   | 2               | 13           | RT      | 24     | 4                         | Li <sub>3</sub> Ct | 2.5            | 5                           | 529 (16.3%)                                                              | 1.28                     | 0.95                 | 0.75                     | 1.3               | Network (15)                | X                    | X                    | X   | This work |
|      |                              |                 |                               | NaOH-fresh |                 |              |         |        |                           |                    |                |                             | 593 (21.2%)                                                              | 1.18                     | 0.57                 | 0.93                     | 1.43              | 10.6 ± 6.3<br>+ > 20 chunks | 18.9                 | 23.4                 | X   | [1]       |
|      |                              |                 |                               | NaOH-old   |                 |              |         |        |                           | Na <sub>3</sub> Ct |                |                             | 540 (28.9%)                                                              | 1.18                     | 0.92                 | 0.90                     | 1.18              | Network (15)                | X                    | X                    | X   | This work |
|      |                              |                 |                               | NaOH-fresh |                 |              |         |        |                           |                    |                |                             | 583 (24.0%)                                                              | 1.49                     | 0.60                 | 0.93                     | 1.32              | 23.9 ± 9.3<br>+ Chunks      | X                    | X                    | X   | [1]       |
|      |                              |                 |                               | NaOH-old   |                 |              |         |        |                           | PVP                |                |                             | 536 (28.5%)                                                              | 1.21                     | 1.00                 | 0.82                     | 1.40              | Network (20)                | X                    | X                    | X   | This work |
|      |                              |                 |                               | NaOH-fresh |                 |              |         |        |                           |                    |                |                             | 625 (x.x%)                                                               | 1.20                     | 0.56                 | 1.00                     | 0.97              | Network (20)                | X                    | X                    | X   | [1]       |

\* before volume contraction; \*\* evaluated as the ratio of A<sub>400</sub> for the sample and the maximum values of A<sub>400</sub> for the dataset at a given v.% of ROH. The number in parenthesis after ‘Network’ gives an indication of the size in nm.

**Table S2B.** Using MeOH as reducing agent.

| ROH  | H <sub>2</sub> O<br>v.%<br>* | ROH<br>v.%<br>* | HAuCl <sub>4</sub><br>mM<br>* | Base       | Base<br>mM<br>* | V<br>mL<br>* | T<br>°C | t<br>h | Base/Au<br>molar<br>ratio | Additive           | Additive<br>mM<br>* | Additive/ Au<br>molar ratio | $\lambda_{spr}$<br>( $\Delta\lambda/\lambda_{spr}$ )<br>nm | A <sub>spr</sub> /A <sub>450</sub> | Relative yield<br>** | A <sub>650</sub> /A <sub>spr</sub> | A <sub>380</sub> /A <sub>800</sub> | d <sub>N</sub><br>nm               | d <sub>S</sub><br>nm | d <sub>V</sub><br>nm | PdI       | Data from |
|------|------------------------------|-----------------|-------------------------------|------------|-----------------|--------------|---------|--------|---------------------------|--------------------|---------------------|-----------------------------|------------------------------------------------------------|------------------------------------|----------------------|------------------------------------|------------------------------------|------------------------------------|----------------------|----------------------|-----------|-----------|
| MeOH | 70                           | 30              | 0.5                           | NaOH-old   | 2               | 13           | RT      | 24     | 4                         | Li <sub>3</sub> Ct | 2.5                 | 5                           | 528 (15.7%)                                                | 1.31                               | 096                  | 0.75                               | 1.6                                | 13.5 ± 6.7<br>Elongated<br>Network | X                    | X                    | X         | This work |
|      |                              |                 |                               | NaOH-fresh |                 |              |         |        |                           | 521 (7.0%)         |                     |                             | 1.61                                                       | 0.91                               | 0.11                 | 21.2                               | 13.0 ± 3.0                         | 14.5                               | 15.5                 | 0.05                 | [1]       |           |
|      |                              |                 |                               | NaOH-old   |                 |              |         |        |                           | 532 (17.1%)        |                     |                             | 1.30                                                       | 0.97                               | 0.78                 | 1.5                                | Worm (> 30)                        | X                                  | X                    | X                    | This work |           |
|      |                              |                 |                               | NaOH-fresh |                 |              |         |        |                           | 524 (6.0%)         |                     |                             | 1.63                                                       | 0.95                               | 0.37                 | 4.3                                | Network (15)<br>> 50               | X                                  | X                    | X                    | [1]       |           |
|      |                              |                 |                               | NaOH-old   |                 |              |         |        |                           | 578 (17.3%)        |                     |                             | 1.55                                                       | 1.00                               | 0.81                 | 1.79                               | Network (15)                       | X                                  | X                    | X                    | This work |           |
|      |                              |                 |                               | NaOH-fresh |                 |              |         |        |                           | 681 (x.x%)         |                     |                             | 1.23                                                       | 0.50                               | 1.00                 | 0.93                               | Network (20)                       | X                                  | X                    | X                    | [1]       |           |

\* before volume contraction; \*\* evaluated as the ratio of A<sub>400</sub> for the sample and the maximum values of A<sub>400</sub> for the dataset at a given v.% of ROH. The number in parenthesis after ‘Network’ gives an indication of the size in nm.

**Table S3.** Effect of using a fresh or an aged stock solution of base for the RT synthesis of surfactant-free Au NPs, for different alcohols. UV-vis and TEM characterization.

| ROH        | H <sub>2</sub> O<br>v.%<br>* | Alcohol<br>v.%<br>* | HAuCl <sub>4</sub><br>mM* | Base       | Base<br>mM<br>* | V<br>mL<br>* | T<br>°C | t<br>h | Base/Au<br>molar<br>ratio | $\lambda_{\text{spr}}$<br>( $\Delta\lambda/\lambda_{\text{spr}}$ )<br>nm | A <sub>spr</sub> /A <sub>450</sub> | Relative yield<br>** | A <sub>650</sub> /A <sub>spr</sub> | A <sub>380</sub> /A <sub>800</sub> | d <sub>N</sub><br>nm | d <sub>s</sub><br>nm | d <sub>v</sub><br>nm | PdI       | Data from |
|------------|------------------------------|---------------------|---------------------------|------------|-----------------|--------------|---------|--------|---------------------------|--------------------------------------------------------------------------|------------------------------------|----------------------|------------------------------------|------------------------------------|----------------------|----------------------|----------------------|-----------|-----------|
| EG         | 70                           | 30                  | 0.5                       | NaOH-old   | 2               | 13           | RT      | 24     | 4                         | 553 (9.9%)                                                               | 0.75                               | 0.06                 | 0.67                               | 12.0                               | X                    | X                    | X                    | X         | This work |
|            |                              |                     |                           | NaOH-fresh |                 |              |         |        |                           | 533 (6.6%)                                                               | 1.80                               | 1.00                 | 0.21                               | 8.2                                | 19.3 ± 9.7           | 29.1                 | 33.3                 | 0.25      | This work |
| NaOH-old   |                              |                     |                           | 528 (6.1%) |                 |              |         |        |                           | 0.96                                                                     | 1.00                               | 0.07                 | 46.7                               | 17.3 ± 4.3                         | 19.1                 | 19.7                 | 0.06                 | This work |           |
| NaOH-fresh |                              |                     |                           | 526 (7.2%) |                 |              |         |        |                           | 1.56                                                                     | 0.88                               | 0.14                 | 17.8                               | 10.1 ± 2.7                         | 11.6                 | 12.3                 | 0.07                 | This work |           |
| NaOH-fresh |                              |                     |                           | 518 (6.9%) |                 |              |         |        |                           | 1.52                                                                     | -                                  | 0.10                 | 34.0                               | 8.9 ± 2.2                          | 10.0                 | 10.5                 | 0.06                 | [1]       |           |
| NaOH-fresh |                              |                     |                           | 531 (6.3%) |                 |              |         |        |                           | 1.84                                                                     | -                                  | 0.17                 | 14.3                               | 21.2 ± 7.1                         | 26.3                 | 29.1                 | 0.11                 | [1]       |           |

\* before volume contraction; \*\* evaluated as the ratio of A<sub>400</sub> for the sample and the maximum values of A<sub>400</sub> for the dataset for a given alcohol.

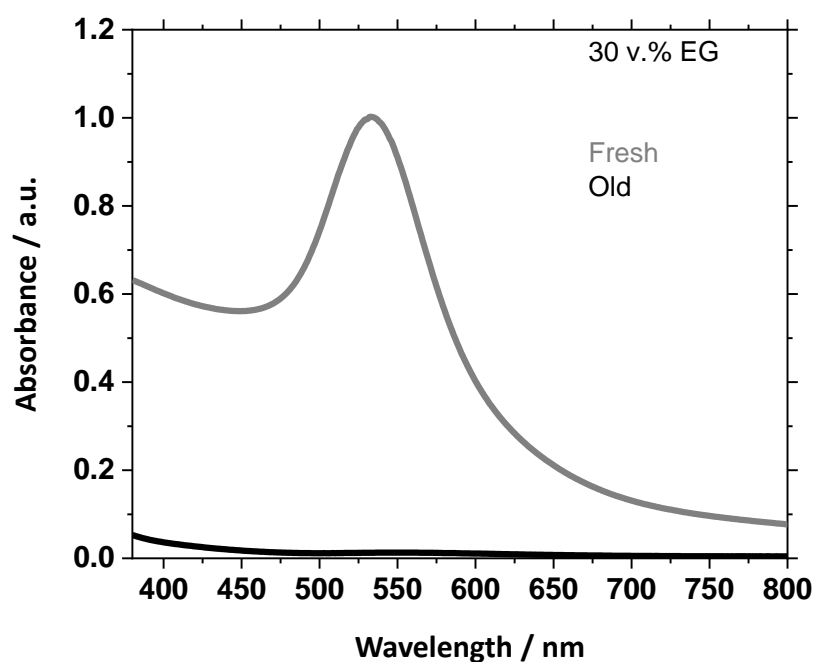

**Figure S1.** UV-vis characterization of Au NMs obtained by a surfactant-free RT synthesis using 30 v.% ethylene glycol as reducing agent prepared using a fresh or an old stock solution of NaOH, as indicated.

## References

1. Quinson, J.; Aalling-Frederiksen, O.; Dacayan, W.L.; Bjerregaard, J.D.; Jensen, K.D.; Jørgensen, M.R.V.; Kantor, I.; Sørensen, D.R.; Theil Kuhn, L.; Johnson, M.S.; et al. Surfactant-free colloidal syntheses of gold-based nanomaterials in alkaline water and mono-alcohol mixtures. *Chem. Mater.* **2023**, *35*, 2173–2190.  
<https://doi.org/10.1021/acs.chemmater.3c00090>.
